# Supplementary material for: Traits controlling shade tolerance in tropical montane trees
Source: PubMed Central journal article supplement (PMC7048680; doi:10.1093/treephys/tpz119), 2019-12-19
Supplement: ntawuhiganayo_supplementary_re-re-revision_tpz119.pdf [file ntawuhiganayo_supplementary_re-re-revision_tpz119.pdf]

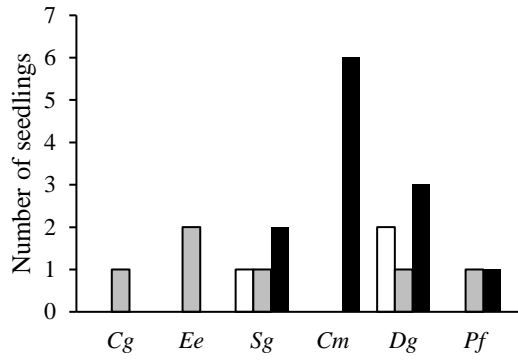

**Figure S1.** The tree mortality (number of individual seedlings) of *Carapa grandiflora* (Cg), *Entandrophragma excelsum* (Ee), *Syzygium guineense* (Sg), *Croton megalocarpus* (Cm), *Dombeya goetzenii* (Dg) and *Polyscias fulva* (Pf) planted in open-canopy (white), sparse-canopy (gray) and dense-canopy (black).

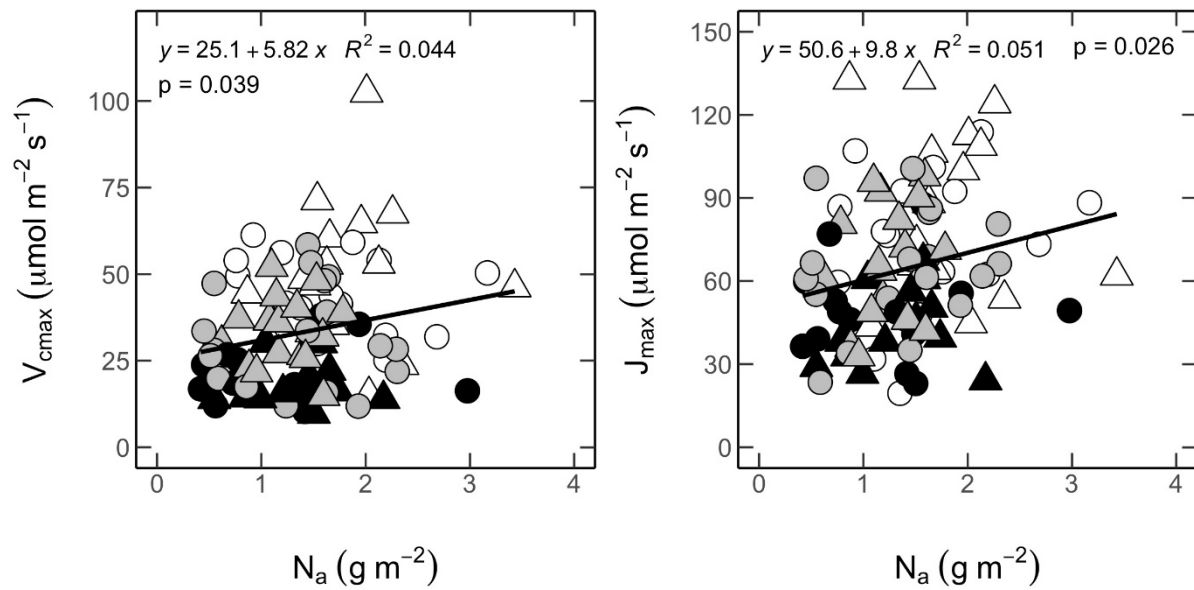

**Figure S2.** The (a) the maximum rates of photosynthetic carboxylation ( $V_{cmax}$ ) and (b) electron transport ( $J_{max}$ ) in relation to leaf nitrogen content per unit leaf area ( $N_a$ ). Each data point represents an individual leaf of shade tolerant (triangles) and shade intolerant (circle) tree species grown in open (white), sparse canopy (gray) and dense canopy (black) plots. The dark lines represent the linear regression for  $V_{cmax}$  ( $y = 5.87x + 24.6$ ) and  $J_{max}$  ( $y = 9.8x + 50.6$ ).

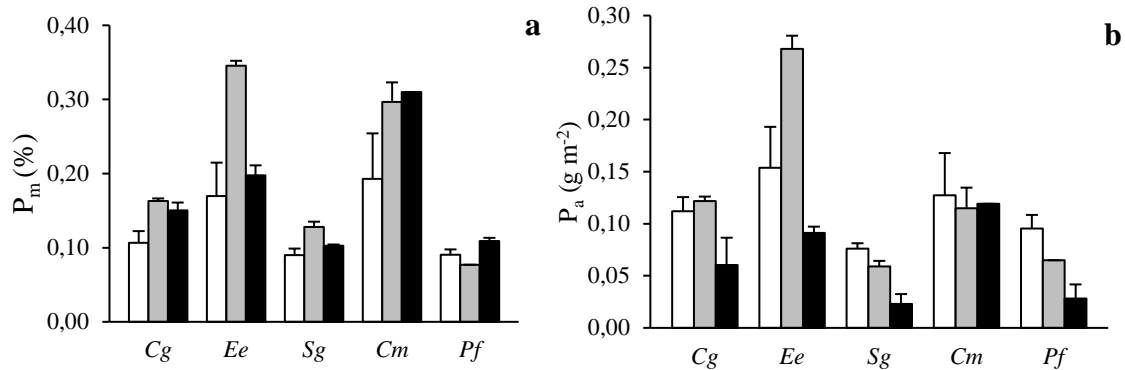

**Figure S3.** Leaf (a) mass-based ( $P_m$ ) and (b) area-based phosphorus ( $P_a$ ) content of six tropical tree species grown in open (white), sparse canopy (gray) and dense canopy (black) plots. The error bars represent standard errors ( $n = 3$ ). Species: *Carapa grandiflora* (*Cg*), *Entandrophragma excelsum* (*Ee*), *Syzygium guineense* (*Sg*), *Croton megalocarpus* (*Cm*) and *Polyscias fulva* (*Pf*).

**Table S1.** Initial harvest data LMA and the biomass of roots, stems, and branches with leaves for *Carapa grandiflora* (*Cg*), *Entandrophragma excelsum* (*Ee*), *Syzygium guineense* (*Sg*), *Croton megalocarpus* (*Cm*), *Dombeya goetzenii* (*Dg*) and *Polyscias fulva* (*Pf*). Values are mean  $\pm$  SE.

|           | <b>Roots (g)</b> | <b>Stem (g)</b> | <b>Branches +<br/>leaves (g)</b> | <b>Total mass<br/>(g)</b> | <b>LMA (g m<sup>-2</sup>)</b> |
|-----------|------------------|-----------------|----------------------------------|---------------------------|-------------------------------|
| <i>Cg</i> | 2.95 $\pm$ 0.26  | 3.40 $\pm$ 0.28 | 2.13 $\pm$ 0.23                  | 8.22 $\pm$ 0.67           | 68.2 $\pm$ 1.1                |
| <i>Ee</i> | 2.17 $\pm$ 0.23  | 3.43 $\pm$ 0.37 | 3.85 $\pm$ 0.56                  | 9.45 $\pm$ 1.11           | 62.8 $\pm$ 3.5                |
| <i>Sg</i> | 1.38 $\pm$ 0.13  | 1.79 $\pm$ 0.23 | 1.61 $\pm$ 0.12                  | 4.78 $\pm$ 0.46           | 89.8 $\pm$ 3.0                |
| <i>Cm</i> | 3.10 $\pm$ 0.55  | 8.46 $\pm$ 1.21 | 2.82 $\pm$ 0.74                  | 14.38 $\pm$ 2.22          | 40.5 $\pm$ 2.3                |
| <i>Dg</i> | 1.77 $\pm$ 0.18  | 4.75 $\pm$ 0.36 | 1.08 $\pm$ 0.13                  | 7.60 $\pm$ 0.50           | 42.8 $\pm$ 6.4                |
| <i>Pf</i> | 1.48 $\pm$ 0.20  | 3.52 $\pm$ 0.44 | 1.83 $\pm$ 0.84                  | 6.84 $\pm$ 0.85           | 53.8 $\pm$ 8.7                |

**Table S2.** Entire database, including physiological, chemical and structural leaf traits as well as tree biomass and its allocation. Values are mean  $\pm$  SE.

|                                                                          |           | Plant species         |                    |                     |                        |                     |                 |                 |
|--------------------------------------------------------------------------|-----------|-----------------------|--------------------|---------------------|------------------------|---------------------|-----------------|-----------------|
|                                                                          |           | <i>C. grandiflora</i> | <i>E. excelsum</i> | <i>S. guineense</i> | <i>C. megalocarpus</i> | <i>D. goetzenii</i> | <i>P. fulva</i> | <i>All</i>      |
| <b>Leaf traits</b>                                                       | <b>OP</b> |                       |                    |                     |                        |                     |                 |                 |
|                                                                          | <b>SP</b> |                       |                    |                     |                        |                     |                 |                 |
|                                                                          | <b>DP</b> |                       |                    |                     |                        |                     |                 |                 |
| <b>V<sub>cmax</sub></b><br>( $\mu\text{mol m}^{-2}\text{s}^{-1}$ )       | <b>OP</b> | 30.5 $\pm$ 1.2        | 30.5 $\pm$ 5.0     | 45.2 $\pm$ 1.8      | 51.6 $\pm$ 5.5         | 62.8 $\pm$ 8.5      | 48.9 $\pm$ 5.1  | 44.9 $\pm$ 1.8  |
|                                                                          | <b>SP</b> | 41.1 $\pm$ 5.0        | 27.5 $\pm$ 3.6     | 22.8 $\pm$ 3.4      | 31.6 $\pm$ 6.3         | 36.2 $\pm$ 3.3      | 30.7 $\pm$ 3.4  | 31.7 $\pm$ 3.0  |
|                                                                          | <b>DP</b> | 34.2 $\pm$ 1.6        | 19.0 $\pm$ 1.6     | 14.9 $\pm$ 2.1      | 17.9 $\pm$ 0.4         | 20.9 $\pm$ 1.7      | 17.5 $\pm$ 1.1  | 21.0 $\pm$ 0.3  |
| <b>J<sub>max</sub></b><br>( $\mu\text{mol m}^{-2}\text{s}^{-1}$ )        | <b>OP</b> | 53.1 $\pm$ 5.7        | 55.2 $\pm$ 3.3     | 88.5 $\pm$ 7.9      | 84.8 $\pm$ 13.5        | 107.6 $\pm$ 5.1     | 75.2 $\pm$ 9.1  | 77.4 $\pm$ 2.5  |
|                                                                          | <b>SP</b> | 65.1 $\pm$ 7.5        | 70.2 $\pm$ 10.7    | 63.6 $\pm$ 4.4      | 62.3 $\pm$ 8.6         | 69.3 $\pm$ 5.3      | 62.9 $\pm$ 10.9 | 65.6 $\pm$ 1.9  |
|                                                                          | <b>DP</b> | 52.9 $\pm$ 15.3       | 47.0 $\pm$ 7.0     | 44.3 $\pm$ 2.8      | 48.6 $\pm$ 1.7         | 45.7 $\pm$ 6.5      | 46.3 $\pm$ 6.8  | 48.1 $\pm$ 4.7  |
| <b>J<sub>max</sub>/V<sub>cmax</sub></b>                                  | <b>OP</b> | 1.62 $\pm$ 0.05       | 1.96 $\pm$ 0.27    | 1.99 $\pm$ 0.09     | 1.65 $\pm$ 0.07        | 1.84 $\pm$ 0.17     | 1.54 $\pm$ 0.12 | 1.77 $\pm$ 0.07 |
|                                                                          | <b>SP</b> | 1.87 $\pm$ 0.43       | 2.60 $\pm$ 0.19    | 3.13 $\pm$ 0.31     | 2.22 $\pm$ 0.53        | 1.89 $\pm$ 0.09     | 2.02 $\pm$ 0.18 | 2.29 $\pm$ 0.22 |
|                                                                          | <b>DP</b> | 1.49 $\pm$ 0.37       | 2.52 $\pm$ 0.26    | 3.29 $\pm$ 0.61     | 2.71 $\pm$ 0.07        | 2.15 $\pm$ 0.15     | 2.64 $\pm$ 0.25 | 2.48 $\pm$ 0.23 |
| <b>R<sub>d</sub></b><br>( $\mu\text{mol m}^{-2}\text{s}^{-1}$ )          | <b>OP</b> | 0.70 $\pm$ 0.04       | 0.87 $\pm$ 0.07    | 0.78 $\pm$ 0.11     | 0.67 $\pm$ 0.08        | 0.76 $\pm$ 0.16     | 0.61 $\pm$ 0.10 | 0.73 $\pm$ 0.07 |
|                                                                          | <b>SP</b> | 0.72 $\pm$ 0.15       | 0.50 $\pm$ 0.16    | 0.63 $\pm$ 0.11     | 0.54 $\pm$ 0.14        | 0.65 $\pm$ 0.12     | 0.58 $\pm$ 0.15 | 0.60 $\pm$ 0.10 |
|                                                                          | <b>DP</b> | 0.52 $\pm$ 0.08       | 0.35 $\pm$ 0.06    | 0.59 $\pm$ 0.16     | 0.37 $\pm$ 0.04        | 0.37 $\pm$ 0.02     | 0.38 $\pm$ 0.02 | 0.43 $\pm$ 0.04 |
| <b>LCP</b><br>( $\mu\text{mol mol}^{-1}$ )                               | <b>OP</b> | 12.9 $\pm$ 0.3        | 13.4 $\pm$ 0.8     | 11.1 $\pm$ 1.9      | 11.4 $\pm$ 0.9         | 13.0 $\pm$ 2.0      | 9.6 $\pm$ 1.5   | 12.9 $\pm$ 0.3  |
|                                                                          | <b>SP</b> | 10.6 $\pm$ 0.8        | 6.9 $\pm$ 1.9      | 9.7 $\pm$ 0.9       | 7.0 $\pm$ 1.6          | 8.5 $\pm$ 2.4       | 8.2 $\pm$ 2.9   | 10.6 $\pm$ 0.8  |
|                                                                          | <b>DP</b> | 6.3 $\pm$ 0.6         | 5.1 $\pm$ 0.5      | 6.7 $\pm$ 0.4       | 6.2 $\pm$ 0.5          | 5.6 $\pm$ 2.7       | 5.8 $\pm$ 0.5   | 6.3 $\pm$ 0.6   |
| <b>G<sub>s</sub></b><br>( $\text{mol H}_2\text{O m}^{-2}\text{s}^{-1}$ ) | <b>OP</b> | 0.03 $\pm$ 0.01       | 0.05 $\pm$ 0.01    | 0.14 $\pm$ 0.01     | 0.16 $\pm$ 0.05        | 0.26 $\pm$ 0.08     | 0.15 $\pm$ 0.05 | 0.13 $\pm$ 0.03 |
|                                                                          | <b>SP</b> | 0.04 $\pm$ 0.00       | 0.03 $\pm$ 0.01    | 0.07 $\pm$ 0.02     | 0.08 $\pm$ 0.01        | 0.15 $\pm$ 0.06     | 0.11 $\pm$ 0.03 | 0.08 $\pm$ 0.02 |
|                                                                          | <b>DP</b> | 0.04 $\pm$ 0.01       | 0.02 $\pm$ 0.00    | 0.03 $\pm$ 0.00     | 0.07 $\pm$ 0.02        | 0.05 $\pm$ 0.01     | 0.12 $\pm$ 0.05 | 0.05 $\pm$ 0.01 |
| <b>A<sub>n</sub></b><br>( $\mu\text{mol m}^{-2}\text{s}^{-1}$ )          | <b>OP</b> | 1.80 $\pm$ 0.64       | 1.57 $\pm$ 0.65    | 6.68 $\pm$ 0.30     | 6.83 $\pm$ 1.33        | 8.22 $\pm$ 1.80     | 5.62 $\pm$ 1.57 | 5.12 $\pm$ 0.89 |
|                                                                          | <b>SP</b> | 2.78 $\pm$ 0.41       | 2.56 $\pm$ 0.35    | 3.30 $\pm$ 0.81     | 4.51 $\pm$ 0.55        | 4.98 $\pm$ 1.11     | 3.67 $\pm$ 0.35 | 3.63 $\pm$ 0.42 |
|                                                                          | <b>DP</b> | 2.88 $\pm$ 0.98       | 2.11 $\pm$ 0.40    | 1.46 $\pm$ 0.09     | 2.65 $\pm$ 0.48        | 2.88 $\pm$ 0.51     | 2.26 $\pm$ 0.45 | 2.43 $\pm$ 0.43 |
| <b>P<sub>a</sub></b><br>( $\text{g m}^{-2}$ )                            | <b>OP</b> | 0.11 $\pm$ 0.01       | 0.15 $\pm$ 0.04    | 0.08 $\pm$ 0.01     | 0.15 $\pm$ 0.04        | -                   | 0.06 $\pm$ 0.01 | 0.10 $\pm$ 0.01 |
|                                                                          | <b>SP</b> | 0.08 $\pm$ 0.00       | 0.27 $\pm$ 0.01    | 0.06 $\pm$ 0.01     | 0.11 $\pm$ 0.02        | -                   | 0.02 $\pm$ 0.00 | 0.08 $\pm$ 0.02 |
|                                                                          | <b>DP</b> | 0.06 $\pm$ 0.03       | 0.09 $\pm$ 0.01    | 0.02 $\pm$ 0.01     | 0.04 $\pm$ 0.00        | -                   | 0.02 $\pm$ 0.01 | 0.04 $\pm$ 0.00 |

|                                              |           |             |             |             |             |             |             |             |
|----------------------------------------------|-----------|-------------|-------------|-------------|-------------|-------------|-------------|-------------|
| <b>P<sub>m</sub></b><br>(%)                  | <b>OP</b> | 0.10 ± 0.02 | 0.17 ± 0.05 | 0.09 ± 0.01 | 0.23 ± 0.06 | -           | 0.06 ± 0.01 | 0.12 ± 0.02 |
|                                              | <b>SP</b> | 0.11 ± 0.00 | 0.35 ± 0.01 | 0.13 ± 0.01 | 0.30 ± 0.03 | -           | 0.03 ± 0.00 | 0.13 ± 0.03 |
|                                              | <b>DP</b> | 0.15 ± 0.01 | 0.20 ± 0.01 | 0.10 ± 0.00 | 0.10 ± 0.00 | -           | 0.07 ± 0.00 | 0.10 ± 0.02 |
| <b>N<sub>a</sub></b><br>(g m <sup>-2</sup> ) | <b>OP</b> | 2.32 ± 0.11 | 1.55 ± 0.13 | 1.16 ± 0.10 | 1.66 ± 0.07 | 1.91 ± 0.07 | 1.75 ± 0.18 | 1.72 ± 0.02 |
|                                              | <b>SP</b> | 2.01 ± 0.12 | 1.47 ± 0.06 | 0.63 ± 0.07 | 1.18 ± 0.05 | 1.00 ± 0.10 | 1.52 ± 0.11 | 1.30 ± 0.01 |
|                                              | <b>DP</b> | 1.88 ± 0.20 | 1.35 ± 0.18 | 0.53 ± 0.01 | 1.35 ± 0.12 | 1.25 ± 0.04 | 1.63 ± 0.03 | 1.32 ± 0.04 |
| <b>N<sub>m</sub></b><br>(%)                  | <b>OP</b> | 1.74 ± 0.05 | 1.65 ± 0.06 | 1.34 ± 0.05 | 2.59 ± 0.14 | 3.68 ± 0.46 | 1.65 ± 0.15 | 2.11 ± 0.07 |
|                                              | <b>SP</b> | 2.02 ± 0.13 | 1.96 ± 0.12 | 1.37 ± 0.07 | 2.73 ± 0.23 | 3.39 ± 0.21 | 2.16 ± 0.15 | 2.27 ± 0.13 |
|                                              | <b>DP</b> | 2.40 ± 0.04 | 2.82 ± 0.10 | 1.60 ± 0.02 | 3.87 ± 0.39 | 4.48 ± 0.23 | 3.06 ± 0.17 | 3.04 ± 0.14 |

|                                        |           | Plant species         |                    |                     |                        |                     |                 |             |
|----------------------------------------|-----------|-----------------------|--------------------|---------------------|------------------------|---------------------|-----------------|-------------|
| Leaf traits                            |           | <i>C. grandiflora</i> | <i>E. excelsum</i> | <i>S. guineense</i> | <i>C. megalocarpus</i> | <i>D. goetzenii</i> | <i>P. fulva</i> | <i>All</i>  |
| <b>LMA</b><br>(g m <sup>-2</sup> )     | <b>OP</b> | 88.3 ± 4.2            | 98.9 ± 5.5         | 185.5 ± 5.7         | 70.1 ± 5.6             | 47.2 ± 3.2          | 99.2 ± 3.4      | 98.2 ± 3.7  |
|                                        | <b>SP</b> | 67.6 ± 5.3            | 65.2 ± 6.4         | 122.8 ± 22.9        | 43.8 ± 6.6             | 30.4 ± 6.1          | 51.1 ± 11.7     | 63.5 ± 9.8  |
|                                        | <b>DP</b> | 56.3 ± 1.8            | 48.8 ± 1.1         | 99.3 ± 16.8         | 28.9 ± 4.6             | 17.8 ± 0.7          | 28.6 ± 2.9      | 47.1 ± 4.5  |
| <b>Leaf length</b><br>(cm)             | <b>OP</b> | 16.3 ± 0.3            | 16.4 ± 1.7         | 11.4 ± 0.4          | 11.4 ± 0.6             | 9.3 ± 0.3           | 9.6 ± 0.6       | 12.4 ± 0.4  |
|                                        | <b>SP</b> | 17.9 ± 0.4            | 21.4 ± 1.1         | 12.7 ± 0.3          | 13.6 ± 0.7             | 13.6 ± 0.8          | 11.0 ± 1.1      | 15.0 ± 0.6  |
|                                        | <b>DP</b> | 17.7 ± 0.5            | 21.7 ± 0.9         | 13.8 ± 0.5          | 12.7 ± 1.8             | 11.7 ± 0.7          | 13.1 ± 0.6      | 15.3 ± 0.6  |
| <b>Leaf width</b><br>(cm)              | <b>OP</b> | 6.23 ± 0.33           | 7.14 ± 0.47        | 3.12 ± 0.23         | 5.90 ± 0.31            | 8.39 ± 0.47         | 4.31 ± 0.24     | 5.85 ± 1.10 |
|                                        | <b>SP</b> | 5.91 ± 0.13           | 8.69 ± 0.57        | 3.84 ± 0.11         | 6.69 ± 0.04            | 12.92 ± 0.65        | 5.04 ± 0.38     | 7.18 ± 0.23 |
|                                        | <b>DP</b> | 6.54 ± 0.06           | 8.51 ± 0.44        | 4.13 ± 0.48         | 8.09 ± 0.80            | 10.12 ± 0.20        | 5.45 ± 0.26     | 7.28 ± 0.28 |
| <b>Leaf thickness</b><br>(mm)          | <b>OP</b> | 0.25 ± 0.01           | 0.27 ± 0.00        | 0.29 ± 0.02         | 0.26 ± 0.01            | 0.25 ± 0.01         | 0.29 ± 0.01     | 0.27 ± 0.01 |
|                                        | <b>SP</b> | 0.21 ± 0.01           | 0.21 ± 0.01        | 0.27 ± 0.02         | 0.20 ± 0.01            | 0.19 ± 0.01         | 0.24 ± 0.02     | 0.22 ± 0.01 |
|                                        | <b>DP</b> | 0.17 ± 0.01           | 0.18 ± 0.00        | 0.21 ± 0.01         | 0.16 ± 0.00            | 0.18 ± 0.01         | 0.19 ± 0.02     | 0.18 ± 0.01 |
| <b>Leaf size</b><br>(cm <sup>2</sup> ) | <b>OP</b> | 64.3 ± 3.5            | 60.1 ± 1.0         | 10.5 ± 1.3          | 22.9 ± 4.2             | 42.3 ± 21.6         | 18.0 ± 0.7      | 36.4 ± 4.6  |
|                                        | <b>SP</b> | 71.2 ± 7.2            | 135.7 ± 16.3       | 16.5 ± 2.6          | 48.4 ± 9.4             | 104.3 ± 22.9        | 31.2 ± 6.4      | 67.9 ± 10.6 |
|                                        | <b>DP</b> | 67.5 ± 3.2            | 110.1 ± 1.6        | 16.6 ± 3.8          | 55.8 ± 4.9             | 40.3 ± 4.9          | 26.8 ± 4.4      | 52.0 ± 2.0  |
| <b>Leaf angle</b><br>(°)               | <b>OP</b> | 66 ± 2                | 27 ± 2             | 44 ± 3              | 52 ± 2                 | 34 ± 5              | 56 ± 3          | 47 ± 1      |
|                                        | <b>SP</b> | 33 ± 2                | 25 ± 2             | 29 ± 2              | 30 ± 5                 | 20 ± 2              | 20 ± 7          | 26 ± 3      |
|                                        | <b>DP</b> | 24 ± 1                | 16 ± 1             | 16 ± 1              | 25 ± 3                 | 17 ± 3              | 14 ± 2          | 19 ± 1      |
| <b>SPAD</b>                            | <b>OP</b> | 51.2 ± 0.8            | 44.3 ± 4.4         | 52.0 ± 1.5          | 34.3 ± 1.8             | 31.0 ± 1.0          | 32.9 ± 1.1      | 41.0 ± 0.9  |
|                                        | <b>SP</b> | 60.3 ± 2.5            | 54.9 ± 4.9         | 50.5 ± 2.9          | 43.6 ± 3.6             | 33.6 ± 2.0          | 31.9 ± 1.3      | 45.8 ± 2.6  |
|                                        | <b>DP</b> | 69.6 ± 0.6            | 64.8 ± 2.4         | 57.9 ± 1.5          | 44.3 ± 1.6             | 34.3 ± 3.9          | 31.9 ± 0.4      | 50.6 ± 0.9  |

|                                             |           | Plant species         |                    |                     |                        |                     |                 |             |
|---------------------------------------------|-----------|-----------------------|--------------------|---------------------|------------------------|---------------------|-----------------|-------------|
|                                             |           | <i>C. grandiflora</i> | <i>E. excelsum</i> | <i>S. guineense</i> | <i>C. megalocarpus</i> | <i>D. goetzenii</i> | <i>P. fulva</i> | <i>All</i>  |
| <b>RGR</b>                                  | <b>OP</b> | 2.31 ± 0.07           | 2.32 ± 0.04        | 3.09 ± 0.15         | 1.72 ± 0.02            | 2.39 ± 0.17         | 2.79 ± 0.07     | 2.35 ± 0.07 |
|                                             | <b>SP</b> | 2.23 ± 0.11           | 2.45 ± 0.12        | 2.54 ± 0.11         | 1.43 ± 0.11            | 2.29 ± 0.11         | 2.17 ± 0.02     | 2.17 ± 0.04 |
|                                             | <b>DP</b> | 1.25 ± 0.05           | 1.53 ± 0.12        | 1.59 ± 0.06         | 0.08 ± 0.28            | 1.15 ± 0.12         | 1.13 ± 0.14     | 1.18 ± 0.04 |
| <b>Roots Weight</b><br>(g)                  | <b>OP</b> | 35.6 ± 3.2            | 26.8 ± 1.2         | 41.9 ± 5.6          | 34.5 ± 1.2             | 41.1 ± 7.4          | 30.2 ± 2.7      | 33.7 ± 1.5  |
|                                             | <b>SP</b> | 26.7 ± 4.7            | 29.9 ± 3.7         | 18.7 ± 1.5          | 18.0 ± 2.2             | 26.6 ± 5.1          | 17.3 ± 0.8      | 23.0 ± 2.4  |
|                                             | <b>DP</b> | 10.6 ± 0.8            | 12.5 ± 1.2         | 7.1 ± 0.3           | 5.1 ± 1.9              | 8.1 ± 0.8           | 5.6 ± 0.7       | 8.5 ± 0.5   |
| <b>Stem Weight</b><br>(g)                   | <b>OP</b> | 30.0 ± 2.1            | 31.9 ± 0.8         | 33.0 ± 6.4          | 30.7 ± 0.6             | 32.0 ± 2.7          | 51.9 ± 2.9      | 34.7 ± 1.7  |
|                                             | <b>SP</b> | 34.3 ± 2.1            | 36.9 ± 3.9         | 27.9 ± 1.7          | 32.2 ± 3.4             | 40.2 ± 2.7          | 27.0 ± 1.0      | 33.2 ± 0.6  |
|                                             | <b>DP</b> | 12.4 ± 0.9            | 14.6 ± 1.7         | 9.3 ± 0.3           | 9.6 ± 2.0              | 14.0 ± 2.1          | 11.3 ± 1.6      | 12.0 ± 0.8  |
| <b>Branches+Petioles</b><br>(g)             | <b>OP</b> | 4.52 ± 0.32           | 3.82 ± 0.63        | 9.52 ± 0.40         | 5.59 ± 0.25            | 3.22 ± 0.11         | 4.58 ± 1.30     | 4.95 ± 0.36 |
|                                             | <b>SP</b> | 6.48 ± 0.33           | 6.45 ± 0.66        | 5.94 ± 0.80         | 3.38 ± 0.55            | 2.52 ± 1.09         | 4.25 ± 0.78     | 4.82 ± 0.38 |
|                                             | <b>DP</b> | 2.79 ± 0.01           | 2.85 ± 0.44        | 1.51 ± 0.34         | 0.97 ± 0.49            | 1.14 ± 0.14         | 1.14 ± 0.43     | 1.85 ± 0.21 |
| <b>Leaves Weight</b><br>(g)                 | <b>OP</b> | 17.0 ± 1.7            | 14.6 ± 2.3         | 21.2 ± 3.0          | 6.5 ± 0.6              | 2.6 ± 0.9           | 12.3 ± 1.5      | 12.3 ± 1.3  |
|                                             | <b>SP</b> | 23.3 ± 1.4            | 21.8 ± 2.7         | 16.9 ± 1.1          | 7.9 ± 2.1              | 3.8 ± 0.8           | 8.7 ± 1.4       | 13.8 ± 1.5  |
|                                             | <b>DP</b> | 10.7 ± 0.3            | 11.1 ± 1.2         | 4.9 ± 1.0           | 2.6 ± 1.4              | 1.1 ± 0.4           | 1.7 ± 0.6       | 5.9 ± 0.3   |
| <b>Total Weight</b><br>(g)                  | <b>OP</b> | 87.5 ± 5.0            | 77.5 ± 4.5         | 106.0 ± 15.5        | 77.6 ± 1.3             | 78.9 ± 10.0         | 99.2 ± 5.4      | 86.0 ± 3.0  |
|                                             | <b>SP</b> | 91.1 ± 5.0            | 95.3 ± 8.3         | 69.8 ± 2.1          | 61.7 ± 4.5             | 73.2 ± 8.7          | 57.4 ± 1.3      | 75.0 ± 2.3  |
|                                             | <b>DP</b> | 36.8 ± 1.5            | 41.3 ± 4.5         | 23.0 ± 1.7          | 18.4 ± 5.8             | 24.4 ± 3.4          | 19.8 ± 3.3      | 28.4 ± 1.8  |
| <b>Root/Shoot ratio</b>                     | <b>OP</b> | 0.75 ± 0.10           | 0.55 ± 0.02        | 0.68 ± 0.01         | 0.82 ± 0.02            | 1.12 ± 0.19         | 0.44 ± 0.03     | 0.70 ± 0.05 |
|                                             | <b>SP</b> | 0.42 ± 0.07           | 0.46 ± 0.04        | 0.39 ± 0.05         | 0.43 ± 0.08            | 0.58 ± 0.10         | 0.44 ± 0.03     | 0.45 ± 0.05 |
|                                             | <b>DP</b> | 0.43 ± 0.02           | 0.45 ± 0.01        | 0.44 ± 0.01         | 0.38 ± 0.03            | 0.53 ± 0.03         | 0.42 ± 0.02     | 0.44 ± 0.01 |
| <b>Wood density</b><br>(g/cm <sup>3</sup> ) | <b>OP</b> | 0.68 ± 0.00           | 0.55 ± 0.02        | 0.67 ± 0.03         | 0.68 ± 0.01            | 0.48 ± 0.02         | 0.43 ± 0.02     | 0.58 ± 0.01 |
|                                             | <b>SP</b> | 0.52 ± 0.02           | 0.57 ± 0.01        | 0.68 ± 0.03         | 0.68 ± 0.02            | 0.45 ± 0.01         | 0.37 ± 0.01     | 0.54 ± 0.01 |
|                                             | <b>DP</b> | 0.55 ± 0.01           | 0.54 ± 0.01        | 0.64 ± 0.01         | 0.59 ± 0.02            | 0.35 ± 0.02         | 0.37 ± 0.03     | 0.51 ± 0.01 |



|                              |           |             |             |              |             |             |             |             |
|------------------------------|-----------|-------------|-------------|--------------|-------------|-------------|-------------|-------------|
| <b>Base diameter</b><br>(cm) | <b>OP</b> | 1.35 ± 0.03 | 1.56 ± 0.03 | 1.13 ± 0.06  | 1.24 ± 0.04 | 1.29 ± 0.02 | 1.83 ± 0.06 | 1.40 ± 0.02 |
|                              | <b>SP</b> | 1.42 ± 0.06 | 1.70 ± 0.10 | 1.19 ± 0.03  | 1.14 ± 0.04 | 1.38 ± 0.03 | 1.52 ± 0.04 | 1.39 ± 0.03 |
|                              | <b>DP</b> | 0.90 ± 0.03 | 1.14 ± 0.04 | 0.75 ± 0.03  | 0.63 ± 0.08 | 0.95 ± 0.03 | 1.14 ± 0.06 | 0.91 ± 0.02 |
| <b>Stem height</b><br>(cm)   | <b>OP</b> | 47.4 ± 2.1  | 47.8 ± 0.7  | 81.6 ± 4.1   | 89.8 ± 3.4  | 111.9 ± 2.0 | 70.5 ± 3.4  | 74.8 ± 1.2  |
|                              | <b>SP</b> | 87.8 ± 3.5  | 51.9 ± 0.9  | 108.7 ± 14.2 | 114.2 ± 7.8 | 164.9 ± 6.1 | 71.0 ± 4.0  | 99.8 ± 3.7  |
|                              | <b>DP</b> | 57.1 ± 2.2  | 48.7 ± 3.3  | 78.6 ± 3.5   | 91.9 ± 1.8  | 124.6 ± 2.5 | 68.2 ± 3.8  | 77.8 ± 1.1  |

$V_{\text{cmax}}$ : maximum rates of photosynthetic carboxylation,  $J_{\text{max}}$ : maximum rates of electron transport,  $R_d$ : leaf dark respiration, **LCP**: light compensation point,  $g_s$ : stomatal conductance,  $A_n$ : light-saturated net  $\text{CO}_2$  assimilation,  $P_a$ : area-based Phosphorus content,  $P_m$ : mass-based Phosphorus content,  $N_a$ : Nitrogen content per unit leaf area,  $N_m$ : Nitrogen content per unit leaf mass, **LMA**: leaf mass per unit leaf area, **SPAD**: proxy for leaf chlorophyll content.
